# Supplementary material for: Triglyceride-Glucose Index in Non-Diabetic, Non-Obese Patients with Obstructive Sleep Apnoea
Source: MDPI journal article supplement (doi:10.3390/jcm10091932), 2021-04-29
Supplement: s1 [file s1]

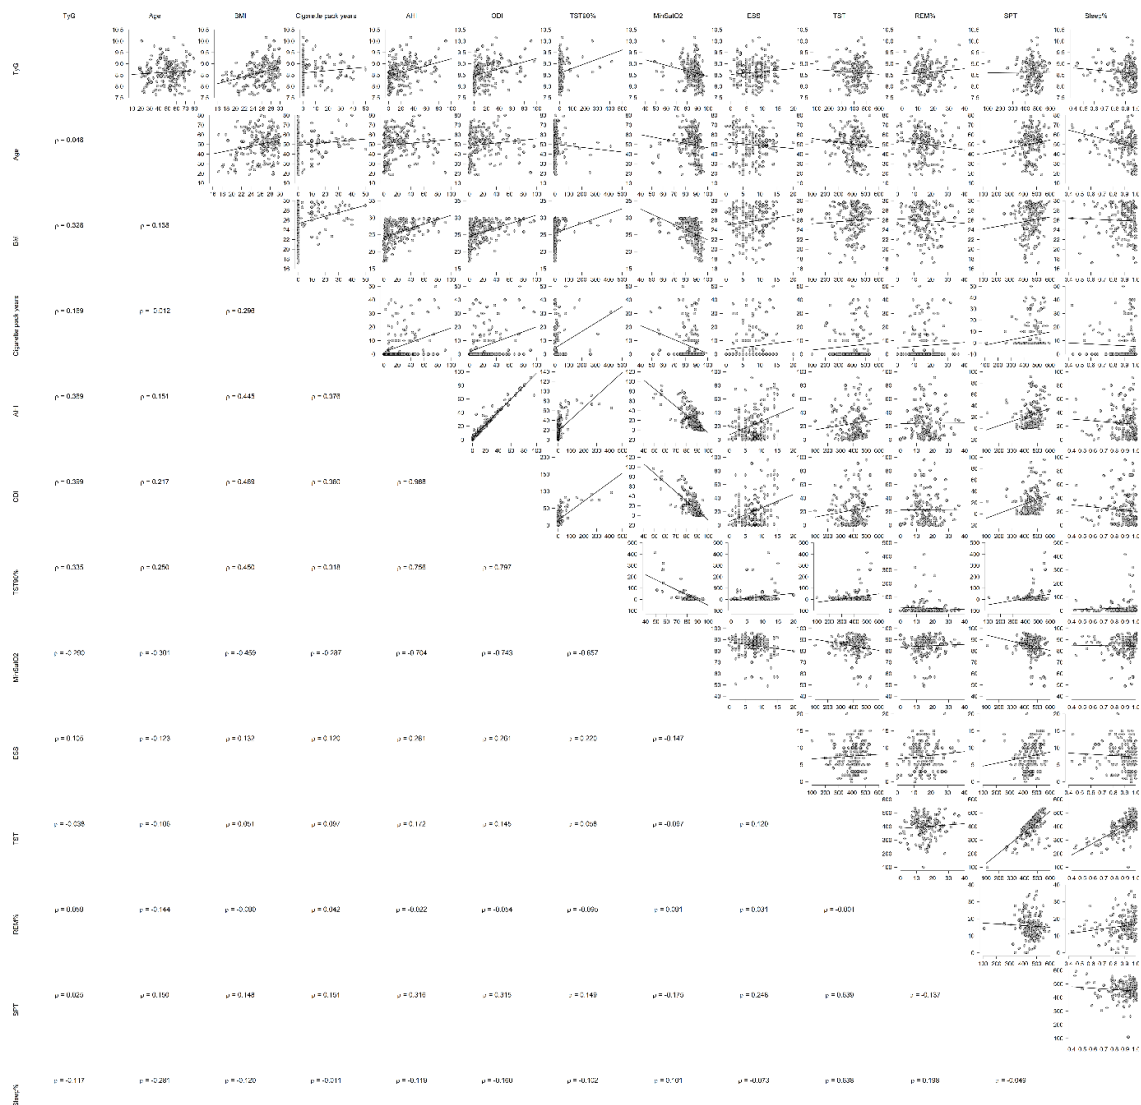

**Supplementary Figure S1.** Correlogram for the bivariate comparisons. AHI – apnoea-hypopnoea index, BMI – body mass index, ESS – Epworth Sleepiness Scale, MinSatO2 – minimal oxygen saturation, ODI – oxygen desaturation index, REM% – percentage of total sleep time spent in rapid eye movement sleep, Sleep% – sleep efficiency, SPT – sleep period time, TST – total sleep time, TST90% - percentage of total sleep time spent with oxygen saturation below 90%, TyG – triglyceride-glucose index
